# Supplementary material for: Laminated composite of ceramic/glass films to realize high luminous efficiency and high color quality in laser-driven white lighting
Source: Royal Society of Chemistry journal article supplement (doi:10.1039/d4tc02314e), 2024-01-01
Supplement: d4tc02314e1.pdf [file d4tc02314e1.pdf]

## Support information

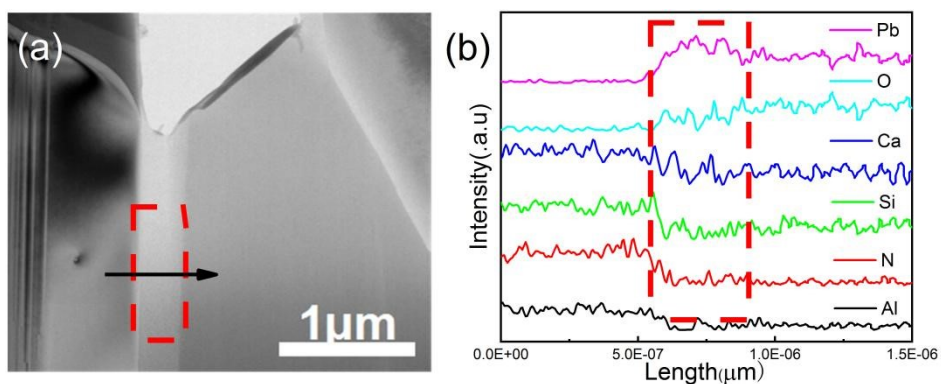

**Fig.S1** Microstructure pattern (a) for the transition layer and the corresponding place in-line EDS (b). In **Fig.S1(a)**, the transition layer is recorded and a small defect is detected in the CASN:Eu particle. In **Fig.S1(b)**, the Pb and O element ascends in the transition layer, while the Ca, Si, Al, and N decrease.

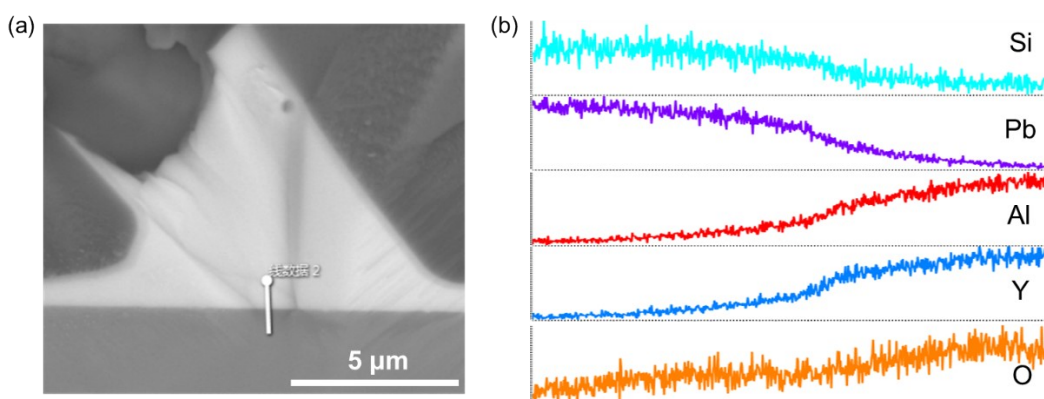

**Fig.S2** Microstructure pattern (a) of the glass and YAG:Ce-CPs and the corresponding place in-line EDS (b). In **Fig.S2(a)**, the interface between glass and YAG:Ce-CPs is very clear, and there is no transition layer. In **Fig.S2(b)**, the Pb and Si elements exist in the glass and disappear in YAG:Ce-CPs, while Y exists in YAG:Ce-CPs and disappears in the glass.

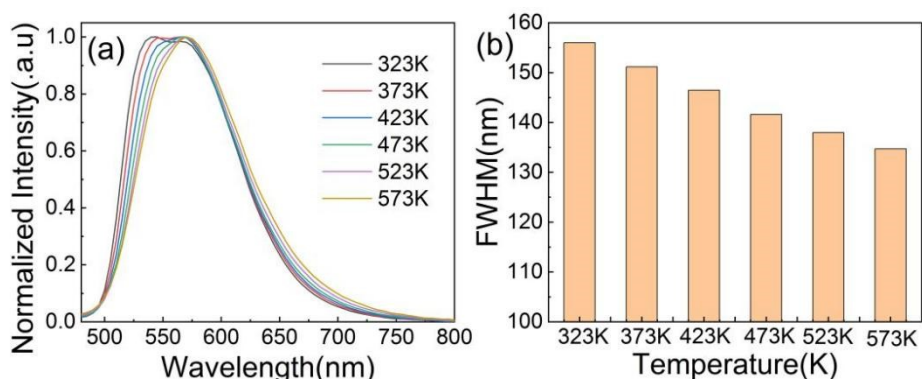

**Fig.S3** (a) Normalized PL spectra of YAG-CPs taken from 323 to 573 K and (b) FWHM of 1R taken from 323 to 573 K. In **Fig.S3(a)**, a red-shift can be found for YAG-CPs as the temperature raises from 323 to 523 K. Because of the peak-shift of phosphor, the FWHM of composite specimen decreases from 156 to 134 nm when the temperature ascends in **Fig.S3(b)**.

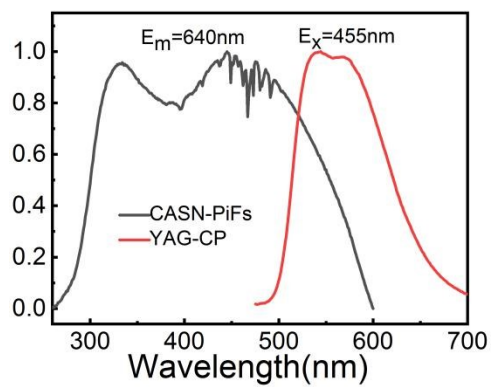

**Fig.S4** Normalized PLE spectrum of CASN-PiGs and PL spectrum of YAG-CPs.

In **Fig.S4** a wide PLE spectrum (270-600 nm) is detected for CASN-PiGs, and there is a large overlap between the PL spectrum of YAG-CPs and the PLE spectrum of CASN-PiGs.
